# Supplementary material for: Accuracy of laser-ablation (LA)-MC-ICPMS Sr isotope analysis of (bio)apatite – a problem reassessed
Source: Royal Society of Chemistry journal article supplement (doi:10.1039/c5ja00311c), 2015-10-28
Supplement: c5ja00311c1.pdf [file c5ja00311c1.pdf]

**Electronic Supplementary Information (ESI):**

Tables S1 – S3 (ESI) for:

**Accuracy of Laser-Ablation (LA)-MC-ICPMS Sr Isotope Analysis of  
(Bio)Apatite – a Problem Reassessed**

Wolfgang Müller and Robert Anczkiewicz

Table S1 (ESI): LA-MC-ICPMS results of  $^{87}\text{Sr}/^{86}\text{Sr}$ ,  $^{84}\text{Sr}/^{86}\text{Sr}$  and  $^{85}\text{Rb}/^{86}\text{Sr}$  ratios of two modern shark enameloid in-house reference samples analyzed interchangeably over four years (Aug. 2010 – Sep. 2014; n=88). The resultant long-term averages of  $^{87}\text{Sr}/^{86}\text{Sr}$  and  $^{84}\text{Sr}/^{86}\text{Sr}$  ratios are  $0.709171 \pm 0.000053$  (2SD) and  $0.056500 \pm 0.000040$  (2 SD), respectively (n=84; two high and low outliers each (\*\*)) have been excluded). WA...shark live-caught offshore W Australia (smaller), SA...South African shark (larger). Plot-Numbers ('plot-no.') are arbitrary consecutive numbers; missing numbers only serve to highlight the different analysis periods and no data are omitted. (See text)

| analysis period | plot-no.     | sample ID    | $^{87}\text{Sr}/^{86}\text{Sr}$ | 2 S.E.   | $^{84}\text{Sr}/^{86}\text{Sr}$ | 2 S.E.   | $^{85}\text{Rb}/^{86}\text{Sr}$ | 2 S.E.   |
|-----------------|--------------|--------------|---------------------------------|----------|---------------------------------|----------|---------------------------------|----------|
| Aug-10          | 1            | WAs shark1   | 0.709210                        | 0.000015 | 0.056529                        | 0.000008 | 0.000127                        | 0.000017 |
|                 | 2            | WAs shark2   | 0.709194                        | 0.000014 | 0.056503                        | 0.000006 | 0.000271                        | 0.000021 |
|                 | 3            | WAs shark3   | 0.709191                        | 0.000034 | 0.056481                        | 0.000013 | 0.000465                        | 0.000055 |
|                 |              | WAs shark4** | 0.709222                        | 0.000014 | 0.056458                        | 0.000010 | 0.001669                        | 0.000016 |
|                 | 4            | WAs shark5   | 0.709181                        | 0.000020 | 0.056455                        | 0.000018 | 0.001518                        | 0.000031 |
|                 | 5            | WAs shark6   | 0.709159                        | 0.000033 | 0.056458                        | 0.000025 | 0.000227                        | 0.000024 |
| Jan-11          | 10           | WAs shark1   | 0.709182                        | 0.000016 | 0.056500                        | 0.000008 | 0.000305                        | 0.000029 |
|                 | 11           | WAs shark2   | 0.709180                        | 0.000031 | 0.056532                        | 0.000019 | 0.000264                        | 0.000036 |
|                 | 12           | WAs shark3   | 0.709156                        | 0.000030 | 0.056516                        | 0.000021 | 0.000200                        | 0.000019 |
|                 | 13           | WAs shark4   | 0.709148                        | 0.000032 | 0.056543                        | 0.000026 | 0.000273                        | 0.000040 |
|                 | 14           | WAs shark5   | 0.709202                        | 0.000024 | 0.056513                        | 0.000014 | 0.000194                        | 0.000028 |
|                 | 15           | WAs shark6   | 0.709161                        | 0.000026 | 0.056536                        | 0.000014 | 0.000204                        | 0.000018 |
|                 | 16           | WAs shark7   | 0.709179                        | 0.000038 | 0.056571                        | 0.000020 | 0.000283                        | 0.000032 |
|                 | 17           | WAs shark8   | 0.709163                        | 0.000029 | 0.056498                        | 0.000016 | 0.000204                        | 0.000016 |
|                 | 18           | WAs shark9   | 0.709178                        | 0.000030 | 0.056509                        | 0.000017 | 0.000170                        | 0.000022 |
| Apr-12          | 25           | WAs shark1   | 0.709181                        | 0.000026 | 0.056524                        | 0.000010 | 0.000088                        | 0.000009 |
|                 | 26           | WAs shark2   | 0.709209                        | 0.000019 | 0.056509                        | 0.000008 | 0.000249                        | 0.000028 |
|                 | 27           | WAs shark3   | 0.709180                        | 0.000021 | 0.056520                        | 0.000012 | 0.000250                        | 0.000037 |
|                 | 28           | WAs shark4   | 0.709216                        | 0.000018 | 0.056503                        | 0.000008 | 0.000240                        | 0.000043 |
| Dec-12          | 35           | WAs shark1   | 0.709147                        | 0.000056 | 0.056464                        | 0.000026 | 0.000375                        | 0.000040 |
|                 | 36           | WAs shark2   | 0.709105                        | 0.000031 | 0.056515                        | 0.000018 | 0.000672                        | 0.000090 |
|                 | 37           | SA shark1    | 0.709163                        | 0.000024 | 0.056500                        | 0.000017 | 0.000107                        | 0.000013 |
|                 | 38           | SA shark2    | 0.709154                        | 0.000019 | 0.056495                        | 0.000009 | 0.000175                        | 0.000010 |
|                 | 39           | SA shark3    | 0.709176                        | 0.000020 | 0.056507                        | 0.000011 | 0.000227                        | 0.000016 |
| Apr-13          | 45           | SA shark1    | 0.709176                        | 0.000021 | 0.056488                        | 0.000010 | 0.000065                        | 0.000015 |
|                 | 46           | SA shark2    | 0.709231                        | 0.000025 | 0.056490                        | 0.000017 | 0.000165                        | 0.000016 |
|                 | 47           | SA shark3    | 0.709188                        | 0.000019 | 0.056517                        | 0.000013 | 0.000239                        | 0.000014 |
|                 | 48           | SA shark4    | 0.709225                        | 0.000018 | 0.056486                        | 0.000010 | 0.000093                        | 0.000008 |
|                 | 49           | SA shark5    | 0.709156                        | 0.000019 | 0.056517                        | 0.000010 | 0.000241                        | 0.000011 |
|                 | 50           | SA shark6    | 0.709178                        | 0.000021 | 0.056484                        | 0.000012 | 0.000099                        | 0.000014 |
|                 | 51           | SA shark7    | 0.709190                        | 0.000021 | 0.056499                        | 0.000012 | 0.000139                        | 0.000012 |
|                 | 52           | SA shark8    | 0.709190                        | 0.000019 | 0.056507                        | 0.000011 | 0.000089                        | 0.000010 |
|                 | 53           | SA shark9    | 0.709128                        | 0.000027 | 0.056510                        | 0.000016 | 0.000234                        | 0.000038 |
|                 | 54           | SA shark10   | 0.709131                        | 0.000016 | 0.056499                        | 0.000009 | 0.000241                        | 0.000010 |
|                 | 55           | SA shark11   | 0.709198                        | 0.000020 | 0.056493                        | 0.000009 | 0.000252                        | 0.000013 |
|                 | 56           | SA shark12   | 0.709167                        | 0.000023 | 0.056480                        | 0.000010 | 0.000180                        | 0.000011 |
|                 | 57           | SA shark13   | 0.709187                        | 0.000034 | 0.056490                        | 0.000018 | 0.000081                        | 0.000020 |
|                 | 58           | WAs shark1   | 0.709134                        | 0.000016 | 0.056492                        | 0.000009 | 0.001654                        | 0.000034 |
|                 | WAs shark2** | 0.709099     | 0.000020                        | 0.056496 | 0.000010                        | 0.001473 | 0.000039                        |          |
| 59              | WAs shark3   | 0.709145     | 0.000022                        | 0.056487 | 0.000013                        | 0.000958 | 0.000021                        |          |
| 60              | WAs shark4   | 0.709166     | 0.000025                        | 0.056515 | 0.000016                        | 0.000201 | 0.000014                        |          |
| 61              | WAs shark5   | 0.709151     | 0.000024                        | 0.056504 | 0.000015                        | 0.000219 | 0.000011                        |          |
| 62              | WAs shark6   | 0.709196     | 0.000018                        | 0.056506 | 0.000011                        | 0.000638 | 0.000114                        |          |

|        |     |                         |                 |                 |                 |                 |                 |                 |
|--------|-----|-------------------------|-----------------|-----------------|-----------------|-----------------|-----------------|-----------------|
| Jul-13 | 70  | SA shark1               | 0.709175        | 0.000039        | 0.056510        | 0.000018        | 0.000163        | 0.000029        |
|        | 71  | SA shark2               | 0.709176        | 0.000027        | 0.056496        | 0.000015        | 0.000215        | 0.000022        |
|        | 72  | SA shark3               | 0.709179        | 0.000022        | 0.056477        | 0.000011        | 0.000147        | 0.000017        |
|        | 73  | SA shark4               | 0.709221        | 0.000016        | 0.056461        | 0.000010        | 0.000118        | 0.000014        |
|        | 74  | SA shark5               | 0.709208        | 0.000019        | 0.056465        | 0.000011        | 0.000117        | 0.000012        |
|        | 75  | SA shark6               | 0.709160        | 0.000025        | 0.056492        | 0.000013        | 0.000198        | 0.000025        |
|        | 76  | SA shark7               | 0.709165        | 0.000061        | 0.056497        | 0.000033        | 0.000016        | 0.000033        |
|        | 77  | SA shark8               | 0.709141        | 0.000024        | 0.056502        | 0.000016        | 0.000142        | 0.000027        |
|        | 78  | SA shark9               | 0.709177        | 0.000021        | 0.056477        | 0.000009        | 0.000128        | 0.000012        |
|        | 79  | SA shark10              | 0.709170        | 0.000019        | 0.056488        | 0.000011        | 0.000114        | 0.000015        |
|        | 80  | SA shark11              | 0.709182        | 0.000021        | 0.056482        | 0.000009        | 0.000106        | 0.000012        |
|        | 81  | SA shark12              | 0.709184        | 0.000018        | 0.056488        | 0.000010        | 0.000092        | 0.000010        |
|        | 82  | SA shark13              | 0.709174        | 0.000019        | 0.056477        | 0.000009        | 0.000015        | 0.000009        |
|        | 83  | SA shark14              | 0.709167        | 0.000018        | 0.056488        | 0.000009        | 0.000086        | 0.000008        |
|        | 84  | SA shark15              | 0.709208        | 0.000020        | 0.056497        | 0.000011        | 0.000108        | 0.000009        |
|        | 85  | SA shark16              | 0.709192        | 0.000019        | 0.056495        | 0.000011        | 0.000141        | 0.000011        |
|        |     |                         |                 |                 |                 |                 |                 |                 |
| Apr-14 | 90  | SA shark1               | 0.709178        | 0.000029        | 0.056506        | 0.000017        | 0.000064        | 0.000042        |
|        | 91  | SA shark2               | 0.709145        | 0.000059        | 0.056512        | 0.000017        | 0.000266        | 0.000085        |
|        | 92  | SA shark3               | 0.709140        | 0.000029        | 0.056528        | 0.000014        | 0.000315        | 0.000015        |
|        | 93  | SA shark4               | 0.709156        | 0.000028        | 0.056507        | 0.000016        | 0.000189        | 0.000028        |
|        | 94  | SA shark5               | 0.709128        | 0.000046        | 0.056527        | 0.000022        | 0.000141        | 0.000027        |
|        | 95  | SA shark6               | 0.709139        | 0.000023        | 0.056508        | 0.000016        | 0.000215        | 0.000027        |
|        | 96  | SA shark7               | 0.709156        | 0.000029        | 0.056492        | 0.000017        | 0.000179        | 0.000030        |
|        | 97  | WAs shark1              | 0.709128        | 0.000022        | 0.056484        | 0.000013        | 0.000317        | 0.000021        |
|        | 98  | WAs shark2              | 0.709130        | 0.000020        | 0.056507        | 0.000013        | 0.000256        | 0.000016        |
|        | 99  | WAs shark3              | 0.709118        | 0.000030        | 0.056523        | 0.000015        | 0.001725        | 0.000037        |
|        | 100 | SA shark8               | 0.709130        | 0.000022        | 0.056527        | 0.000016        | 0.000210        | 0.000014        |
|        | 101 | SA shark9               | 0.709173        | 0.000029        | 0.056511        | 0.000014        | 0.000136        | 0.000014        |
|        | 102 | SA shark10              | 0.709189        | 0.000023        | 0.056507        | 0.000013        | 0.000124        | 0.000014        |
|        |     | SA shark11**            | 0.709098        | 0.000030        | 0.056488        | 0.000018        | 0.000203        | 0.000025        |
|        | 103 | SA shark12              | 0.709165        | 0.000032        | 0.056518        | 0.000023        | 0.000116        | 0.000014        |
|        | 104 | SA shark13              | 0.709144        | 0.000037        | 0.056521        | 0.000022        | 0.000119        | 0.000019        |
|        | 105 | SA shark14              | 0.709133        | 0.000030        | 0.056504        | 0.000015        | 0.000223        | 0.000032        |
|        | 106 | SA shark15              | 0.709179        | 0.000044        | 0.056523        | 0.000022        | 0.000167        | 0.000020        |
|        | 107 | SA shark16              | 0.709148        | 0.000031        | 0.056503        | 0.000027        | 0.000150        | 0.000029        |
|        |     |                         |                 |                 |                 |                 |                 |                 |
| Sep-14 | 115 | SA shark1               | 0.709161        | 0.000024        | 0.056482        | 0.000015        | 0.000129        | 0.000014        |
|        | 116 | SA shark2               | 0.709160        | 0.000024        | 0.056496        | 0.000012        | 0.000220        | 0.000020        |
|        | 117 | SA shark3               | 0.709177        | 0.000021        | 0.056467        | 0.000012        | 0.000155        | 0.000011        |
|        | 118 | SA shark4               | 0.709186        | 0.000021        | 0.056488        | 0.000011        | 0.000077        | 0.000010        |
|        | 119 | SA shark5               | 0.709211        | 0.000024        | 0.056488        | 0.000016        | 0.000088        | 0.000014        |
|        | 120 | SA shark6               | 0.709195        | 0.000026        | 0.056485        | 0.000012        | 0.000097        | 0.000018        |
|        | 121 | SA shark7               | 0.709153        | 0.000016        | 0.056505        | 0.000011        | 0.000214        | 0.000019        |
|        |     | SA shark8**             | 0.709239        | 0.000020        | 0.056473        | 0.000011        | 0.000100        | 0.000015        |
|        | 122 | SA shark9               | 0.709210        | 0.000019        | 0.056479        | 0.000012        | 0.000082        | 0.000009        |
|        | 123 | SA shark10              | 0.709208        | 0.000022        | 0.056495        | 0.000013        | 0.000129        | 0.000017        |
|        |     |                         |                 |                 |                 |                 |                 |                 |
|        |     |                         |                 |                 |                 |                 |                 |                 |
|        |     | <b>average +/- 2 SD</b> | <b>0.709171</b> | <b>0.000053</b> | <b>0.056500</b> | <b>0.000040</b> | <b>0.000277</b> | <b>0.000711</b> |

Table S2 (ESI): Results of Rb-Sr isotopic analyses of aliquots of a virtually Rb-Sr-free, concentrated Ca-P solution (50 ppm Ca – 22 ppm P) to which varying amounts of SRM984 (Rb) and SRM987 (Sr) were added. This serves to emulate LA-MC-ICPMS apatite analysis and constrains the effective  $^{85}\text{Rb}/^{87}\text{Rb}$  ratio used to correct for  $^{87}\text{Rb}$  interference (cf. Fig. 5).

| Aliquot number | $^{85}\text{Rb}/^{86}\text{Sr}_{\text{measured}}$ | 2 S.E.   | $^{87}(\text{Sr}+\text{Rb})/^{86}\text{Sr}^1$ | 2 S.E.   |
|----------------|---------------------------------------------------|----------|-----------------------------------------------|----------|
| 1              | 0.002246                                          | 0.000008 | 0.711169                                      | 0.000022 |
| 2              | 0.002254                                          | 0.000008 | 0.711164                                      | 0.000022 |
| 3              | 0.000759                                          | 0.000002 | 0.710567                                      | 0.000016 |
| 4              | 0.000758                                          | 0.000003 | 0.710557                                      | 0.000016 |
| 5              | 0.000129                                          | 0.000001 | 0.710301                                      | 0.000015 |
| 6              | 0.000126                                          | 0.000001 | 0.710298                                      | 0.000015 |
| 7              | 0.000091                                          | 0.000001 | 0.710283                                      | 0.000014 |
| 8              | 0.011578                                          | 0.000003 | 0.714839                                      | 0.000016 |
| 9              | 0.005853                                          | 0.000003 | 0.712561                                      | 0.000016 |
| 10             | 0.061821                                          | 0.000004 | 0.734639                                      | 0.000016 |
| 11             | 0.129484                                          | 0.000021 | 0.761346                                      | 0.000018 |

<sup>1</sup>...corrected for Sr mass bias ( $^{86}\text{Sr}/^{88}\text{Sr}=0.1194^{21}$ )

Table S3 (ESI): Sr(-Rb)-isotopic results ( $^{87}\text{Sr}/^{86}\text{Sr}$ ,  $^{84}\text{Sr}/^{86}\text{Sr}$  and  $^{85}\text{Rb}/^{86}\text{Sr}$ ) from both LA-MC-ICPMS and comparative microsampling-TIMS of two archaeological teeth from the same individual excavated at the medieval mining community Sulzburg (Black Forest, SW Germany)<sup>37, 38</sup>.

**a) LA-MC-ICPMS:**

| <b>SG85 36 (M1): LA-MC-ICPMS profile</b> |                                 |                                 |                                 |
|------------------------------------------|---------------------------------|---------------------------------|---------------------------------|
| distance [mm]                            | $^{87}\text{Sr}/^{86}\text{Sr}$ | $^{84}\text{Sr}/^{86}\text{Sr}$ | $^{85}\text{Rb}/^{86}\text{Sr}$ |
| 0.042                                    | 0.706910                        | 0.056417                        | 0.009769                        |
| 0.084                                    | 0.707127                        | 0.056420                        | 0.009076                        |
| 0.126                                    | 0.706884                        | 0.056431                        | 0.008327                        |
| 0.168                                    | 0.707138                        | 0.056453                        | 0.008377                        |
| 0.210                                    | 0.706977                        | 0.056564                        | 0.007349                        |
| 0.252                                    | 0.706858                        | 0.056585                        | 0.007855                        |
| 0.295                                    | 0.707212                        | 0.056395                        | 0.007698                        |
| 0.337                                    | 0.707143                        | 0.056472                        | 0.008369                        |
| 0.379                                    | 0.707353                        | 0.056394                        | 0.009351                        |
| 0.421                                    | 0.707183                        | 0.056502                        | 0.009738                        |
| 0.463                                    | 0.707097                        | 0.056427                        | 0.010406                        |
| 0.505                                    | 0.707503                        | 0.056479                        | 0.008613                        |
| 0.547                                    | 0.707539                        | 0.056448                        | 0.007473                        |
| 0.589                                    | 0.707717                        | 0.056551                        | 0.007847                        |
| 0.631                                    | 0.707575                        | 0.056661                        | 0.007283                        |
| 0.673                                    | crack, no data                  |                                 |                                 |
| 0.715                                    | crack, no data                  |                                 |                                 |
| 0.757                                    | crack, no data                  |                                 |                                 |
| 0.799                                    | crack, no data                  |                                 |                                 |
| 0.841                                    | crack, no data                  |                                 |                                 |
| 0.884                                    | crack, no data                  |                                 |                                 |
| 0.926                                    | crack, no data                  |                                 |                                 |
| 0.968                                    | crack, no data                  |                                 |                                 |
| 1.010                                    | 0.707263                        | 0.056507                        | 0.007097                        |
| 1.052                                    | 0.707029                        | 0.056440                        | 0.006199                        |
| 1.094                                    | 0.706977                        | 0.056455                        | 0.006328                        |
| 1.136                                    | 0.706912                        | 0.056565                        | 0.006366                        |
| 1.178                                    | 0.707378                        | 0.056503                        | 0.006231                        |
| 1.220                                    | 0.707113                        | 0.056534                        | 0.007208                        |
| 1.262                                    | 0.707643                        | 0.056594                        | 0.006455                        |
| 1.304                                    | 0.708203                        | 0.056362                        | 0.006784                        |
| 1.346                                    | 0.707931                        | 0.056530                        | 0.006516                        |
| 1.388                                    | 0.707870                        | 0.056491                        | 0.006314                        |
| 1.430                                    | 0.707658                        | 0.056600                        | 0.006268                        |
| 1.473                                    | 0.707920                        | 0.056474                        | 0.006153                        |
| 1.515                                    | 0.707872                        | 0.056533                        | 0.006492                        |
| 1.557                                    | 0.707926                        | 0.056493                        | 0.006355                        |
| 1.599                                    | 0.707766                        | 0.056587                        | 0.006885                        |
| 1.641                                    | 0.707908                        | 0.056538                        | 0.007750                        |
| 1.683                                    | 0.708049                        | 0.056460                        | 0.007158                        |
| 1.725                                    | 0.707045                        | 0.056561                        | 0.006642                        |
| 1.767                                    | 0.707308                        | 0.056569                        | 0.006340                        |
| 1.809                                    | 0.707233                        | 0.056474                        | 0.006115                        |
| 1.851                                    | 0.707189                        | 0.056449                        | 0.006193                        |
| 1.893                                    | 0.706961                        | 0.056447                        | 0.005928                        |
| 1.935                                    | 0.707218                        | 0.056493                        | 0.005880                        |
| 1.977                                    | 0.707139                        | 0.056441                        | 0.005452                        |
| 2.019                                    | 0.707219                        | 0.056600                        | 0.005630                        |
| 2.062                                    | 0.707074                        | 0.056429                        | 0.005582                        |
| 2.104                                    | 0.707345                        | 0.056645                        | 0.005474                        |
| 2.146                                    | 0.707375                        | 0.056562                        | 0.005850                        |
| 2.188                                    | 0.707813                        | 0.056391                        | 0.005348                        |
| 2.230                                    | 0.707420                        | 0.056367                        | 0.005304                        |
| 2.272                                    | 0.707115                        | 0.056602                        | 0.006114                        |
| 2.314                                    | 0.707180                        | 0.056553                        | 0.005994                        |
| 2.356                                    | 0.707093                        | 0.056493                        | 0.005698                        |
| 2.398                                    | 0.707026                        | 0.056656                        | 0.006535                        |
| 2.440                                    | 0.707277                        | 0.056509                        | 0.005973                        |
| 2.482                                    | 0.707063                        | 0.056604                        | 0.005727                        |
| 2.524                                    | 0.707119                        | 0.056499                        | 0.005612                        |
| 2.566                                    | 0.707024                        | 0.056341                        | 0.005100                        |

| distance [mm] | $^{87}\text{Sr}/^{86}\text{Sr}$ | $^{84}\text{Sr}/^{86}\text{Sr}$ | $^{85}\text{Rb}/^{86}\text{Sr}$ |
|---------------|---------------------------------|---------------------------------|---------------------------------|
| 2.608         | 0.707075                        | 0.056503                        | 0.005291                        |
| 2.651         | 0.707091                        | 0.056539                        | 0.005107                        |
| 2.693         | 0.707138                        | 0.056510                        | 0.004979                        |
| 2.735         | 0.707467                        | 0.056522                        | 0.004758                        |
| 2.777         | 0.707388                        | 0.056406                        | 0.004394                        |
| 2.819         | 0.707355                        | 0.056410                        | 0.004794                        |
| 2.861         | 0.707451                        | 0.056405                        | 0.004440                        |

| <b>SG85 48 (M3): LA-MC-ICPMS profile</b> |                                    |                                    |                                    |
|------------------------------------------|------------------------------------|------------------------------------|------------------------------------|
| distance [mm]                            | <sup>87</sup> Sr/ <sup>86</sup> Sr | <sup>84</sup> Sr/ <sup>86</sup> Sr | <sup>85</sup> Rb/ <sup>86</sup> Sr |
| 0.042                                    | 0.713300                           | 0.056600                           | 0.007245                           |
| 0.084                                    | 0.713185                           | 0.056662                           | 0.007277                           |
| 0.126                                    | 0.713518                           | 0.056571                           | 0.007308                           |
| 0.168                                    | 0.713272                           | 0.056470                           | 0.006996                           |
| 0.210                                    | 0.713413                           | 0.056473                           | 0.006602                           |
| 0.252                                    | 0.713849                           | 0.056736                           | 0.006594                           |
| 0.295                                    | 0.714518                           | 0.056512                           | 0.006489                           |
| 0.337                                    | 0.713717                           | 0.056611                           | 0.006105                           |
| 0.379                                    | 0.713820                           | 0.056414                           | 0.005942                           |
| 0.421                                    | 0.713583                           | 0.056578                           | 0.006105                           |
| 0.463                                    | 0.714864                           | 0.056447                           | 0.005953                           |
| 0.505                                    | 0.714707                           | 0.056523                           | 0.006151                           |
| 0.547                                    | 0.715466                           | 0.056186                           | 0.006201                           |
| 0.589                                    | 0.715096                           | 0.056561                           | 0.005972                           |
| 0.631                                    | 0.715014                           | 0.056622                           | 0.005902                           |
| 0.673                                    | 0.715269                           | 0.056452                           | 0.005873                           |
| 0.715                                    | 0.715052                           | 0.056671                           | 0.005962                           |
| 0.757                                    | 0.714683                           | 0.056542                           | 0.005683                           |
| 0.799                                    | 0.714906                           | 0.056435                           | 0.005712                           |
| 0.841                                    | 0.714767                           | 0.056566                           | 0.005886                           |
| 0.884                                    | 0.714952                           | 0.056428                           | 0.005735                           |
| 0.926                                    | 0.714668                           | 0.056310                           | 0.005533                           |
| 0.968                                    | 0.714733                           | 0.056469                           | 0.005600                           |
| 1.010                                    | 0.714858                           | 0.056521                           | 0.005549                           |
| 1.052                                    | 0.714947                           | 0.056657                           | 0.005484                           |
| 1.094                                    | 0.714802                           | 0.056387                           | 0.005291                           |
| 1.136                                    | 0.714535                           | 0.056600                           | 0.005631                           |
| 1.178                                    | 0.715018                           | 0.056595                           | 0.005404                           |
| 1.220                                    | 0.714920                           | 0.056508                           | 0.005508                           |
| 1.262                                    | 0.715312                           | 0.056440                           | 0.005349                           |
| 1.304                                    | 0.715053                           | 0.056501                           | 0.005458                           |
| 1.346                                    | 0.715245                           | 0.056534                           | 0.005547                           |
| 1.388                                    | 0.714823                           | 0.056709                           | 0.005679                           |
| 1.430                                    | 0.714944                           | 0.056496                           | 0.005511                           |
| 1.473                                    | 0.714836                           | 0.056721                           | 0.005499                           |
| 1.515                                    | 0.714787                           | 0.056377                           | 0.005368                           |
| 1.557                                    | 0.715231                           | 0.056340                           | 0.005103                           |
| 1.599                                    | 0.714475                           | 0.056462                           | 0.005221                           |
| 1.641                                    | 0.714810                           | 0.056619                           | 0.005128                           |
| 1.683                                    | 0.714926                           | 0.056402                           | 0.005259                           |
| 1.725                                    | 0.714772                           | 0.056676                           | 0.005333                           |
| 1.767                                    | 0.715486                           | 0.056615                           | 0.005424                           |
| 1.809                                    | 0.715453                           | 0.056667                           | 0.005248                           |
| 1.851                                    | 0.715252                           | 0.056501                           | 0.005051                           |
| 1.893                                    | 0.714773                           | 0.056428                           | 0.005012                           |
| 1.935                                    | 0.714933                           | 0.056495                           | 0.005099                           |
| 1.977                                    | 0.715412                           | 0.056517                           | 0.005116                           |
| 2.019                                    | 0.715444                           | 0.056404                           | 0.005220                           |
| 2.062                                    | 0.715285                           | 0.056505                           | 0.005204                           |
| 2.104                                    | 0.714794                           | 0.056446                           | 0.005199                           |
| 2.146                                    | 0.715420                           | 0.056647                           | 0.004921                           |
| 2.188                                    | 0.715286                           | 0.056544                           | 0.005241                           |
| 2.230                                    | 0.714845                           | 0.056711                           | 0.005139                           |
| 2.272                                    | 0.715030                           | 0.056509                           | 0.005041                           |
| 2.314                                    | 0.715164                           | 0.056759                           | 0.005104                           |
| 2.356                                    | 0.715204                           | 0.056646                           | 0.005025                           |
| 2.398                                    | 0.714850                           | 0.056487                           | 0.004809                           |
| 2.440                                    | 0.714998                           | 0.056565                           | 0.004734                           |
| 2.482                                    | 0.714914                           | 0.056429                           | 0.004721                           |
| 2.524                                    | 0.715127                           | 0.056730                           | 0.004868                           |
| 2.566                                    | 0.715799                           | 0.056644                           | 0.005132                           |
| 2.608                                    | 0.716225                           | 0.056377                           | 0.005413                           |
| 2.651                                    | 0.716394                           | 0.056642                           | 0.005610                           |
| 2.693                                    | 0.716334                           | 0.056684                           | 0.005545                           |
| 2.735                                    | 0.716478                           | 0.056505                           | 0.005527                           |
| 2.777                                    | 0.716675                           | 0.056557                           | 0.005813                           |

| distance [mm] | $^{87}\text{Sr}/^{86}\text{Sr}$ | $^{84}\text{Sr}/^{86}\text{Sr}$ | $^{85}\text{Rb}/^{86}\text{Sr}$ |
|---------------|---------------------------------|---------------------------------|---------------------------------|
| 2.819         | 0.715416                        | 0.056642                        | 0.005381                        |
| 2.861         | 0.715022                        | 0.056499                        | 0.005112                        |
| 2.903         | 0.714561                        | 0.056566                        | 0.004784                        |
| 2.945         | 0.714719                        | 0.056590                        | 0.004825                        |
| 2.987         | 0.714818                        | 0.056348                        | 0.004846                        |
| 3.029         | 0.714343                        | 0.056625                        | 0.004732                        |
| 3.071         | 0.714515                        | 0.056510                        | 0.004454                        |
| 3.113         | 0.714533                        | 0.056529                        | 0.004742                        |
| 3.155         | 0.714951                        | 0.056595                        | 0.004926                        |
| 3.198         | 0.714968                        | 0.056550                        | 0.005241                        |
| 3.240         | 0.714978                        | 0.056579                        | 0.005464                        |
| 3.282         | 0.714823                        | 0.056390                        | 0.005943                        |
| 3.324         | 0.714672                        | 0.056741                        | 0.005748                        |
| 3.366         | 0.714790                        | 0.056400                        | 0.005646                        |
| 3.408         | 0.714749                        | 0.056564                        | 0.006019                        |
| 3.450         | 0.714978                        | 0.056542                        | 0.005506                        |
| 3.492         | 0.714717                        | 0.056632                        | 0.005372                        |
| 3.534         | 0.714689                        | 0.056531                        | 0.005453                        |
| 3.576         | 0.714917                        | 0.056408                        | 0.005431                        |
| 3.618         | 0.714433                        | 0.056393                        | 0.005351                        |
| 3.660         | 0.714384                        | 0.056312                        | 0.005171                        |
| 3.702         | 0.714442                        | 0.056644                        | 0.005338                        |
| 3.744         | 0.714899                        | 0.056512                        | 0.005388                        |
| 3.787         | 0.714696                        | 0.056516                        | 0.005910                        |
| 3.829         | 0.714985                        | 0.056746                        | 0.006992                        |
| 3.871         | 0.714698                        | 0.056556                        | 0.007115                        |
| 3.913         | 0.715089                        | 0.056612                        | 0.006827                        |
| 3.955         | 0.715168                        | 0.056456                        | 0.007003                        |
| 3.997         | 0.715156                        | 0.056487                        | 0.006885                        |
| 4.039         | 0.714993                        | 0.056629                        | 0.006637                        |
| 4.081         | 0.714544                        | 0.056680                        | 0.006588                        |
| 4.123         | 0.714270                        | 0.056342                        | 0.006378                        |
| 4.165         | 0.713748                        | 0.056474                        | 0.005939                        |
| 4.207         | 0.714212                        | 0.056651                        | 0.006235                        |
| 4.249         | 0.714573                        | 0.056617                        | 0.006728                        |
| 4.291         | 0.714675                        | 0.056761                        | 0.006838                        |
| 4.333         | 0.714796                        | 0.056246                        | 0.006925                        |
| 4.376         | 0.714449                        | 0.056447                        | 0.007532                        |
| 4.418         | 0.713945                        | 0.056771                        | 0.007588                        |
| 4.460         | 0.713460                        | 0.056456                        | 0.007547                        |
| 4.502         | 0.713505                        | 0.056504                        | 0.006891                        |
| 4.544         | 0.713322                        | 0.056503                        | 0.007051                        |
| 4.586         | 0.713401                        | 0.056475                        | 0.007709                        |
| 4.628         | 0.713766                        | 0.056479                        | 0.008354                        |
| 4.670         | 0.714332                        | 0.056463                        | 0.008312                        |
| 4.712         | 0.714252                        | 0.056561                        | 0.008497                        |
| 4.754         | 0.714332                        | 0.056506                        | 0.008589                        |
| 4.796         | 0.714323                        | 0.056344                        | 0.008244                        |
| 4.838         | 0.713960                        | 0.056333                        | 0.008525                        |
| 4.880         | 0.714523                        | 0.056380                        | 0.008888                        |
| 4.922         | 0.714013                        | 0.056866                        | 0.008660                        |
| 4.965         | 0.713212                        | 0.056487                        | 0.007940                        |
| 5.007         | 0.712575                        | 0.056405                        | 0.007164                        |
| 5.049         | 0.712624                        | 0.056603                        | 0.007265                        |
| 5.091         | 0.713513                        | 0.056628                        | 0.007536                        |
| 5.133         | 0.713564                        | 0.056667                        | 0.007586                        |
| 5.175         | 0.713594                        | 0.056486                        | 0.007351                        |
| 5.217         | 0.713688                        | 0.056468                        | 0.006422                        |
| 5.259         | 0.713341                        | 0.056457                        | 0.006160                        |
| 5.301         | 0.713084                        | 0.056589                        | 0.006218                        |
| 5.343         | 0.713144                        | 0.056510                        | 0.005963                        |
| 5.385         | 0.713204                        | 0.056537                        | 0.006042                        |
| 5.427         | 0.712920                        | 0.056436                        | 0.006123                        |
| 5.469         | 0.712884                        | 0.056519                        | 0.005566                        |
| 5.511         | 0.712268                        | 0.056597                        | 0.004957                        |
| 5.554         | 0.712489                        | 0.056453                        | 0.005188                        |
| 5.596         | 0.712803                        | 0.056547                        | 0.005604                        |



| distance [mm] | $^{87}\text{Sr}/^{86}\text{Sr}$ | $^{84}\text{Sr}/^{86}\text{Sr}$ | $^{85}\text{Rb}/^{86}\text{Sr}$ |
|---------------|---------------------------------|---------------------------------|---------------------------------|
| 5.638         | 0.712797                        | 0.056583                        | 0.005738                        |
| 5.680         | 0.712973                        | 0.056389                        | 0.005442                        |
| 5.722         | 0.712669                        | 0.056374                        | 0.005470                        |

**b) Microsampling-TIMS:**

| Sample ID | mass [µg] | $^{87}\text{Sr}/^{86}\text{Sr}$ | 2 SE     |
|-----------|-----------|---------------------------------|----------|
| SG85 36   | 720       | 0.707311                        | 0.000018 |
| SG85 48a  | 350       | 0.713718                        | 0.000034 |
| SG85 48c  | 160       | 0.712894                        | 0.000033 |
